# Supplementary material for: Coronary artery disease genes SMAD3 and TCF21 promote opposing interactive genetic programs that regulate smooth muscle cell differentiation and disease risk
Source: PLoS Genet. 2018 Oct 11;14(10):e1007681. doi: 10.1371/journal.pgen.1007681 (PMC6198989; doi:10.1371/journal.pgen.1007681)
Supplement: S3 Table — (XLSX) [file pgen.1007681.s003.xlsx]

## Sheet: Sheet1
Table S3. IPA analysis of genes identified in siTCF21 knockdown-RNA-Seq studies, identified CV System Development and Function terms.
Categories	Diseases or Functions Annotation	p-Value	Predicted Activation State	Activation z-score	Molecules	# Molecules
Cardiovascular System Development and Function	development of vasculature	1.12e-18		0.904	ACKR3,ADAM8,ADAMTS1,ADM2,AKT3,ANGPT1,ANGPTL1,AP3S2,APLN,ARAP3,ARNT,BDKRB2,BDNF,BMP2,CCL11,CD34,COL13A1,CXCL8,CXXC5,DLC1,ECE1,EDN1,EDNRA,EDNRB,ELN,EMP2,EPHB2,ESM1,F2RL1,FGF1,FGF7,GDNF,GLI3,H2AFX,HEG1,HGF,HMOX1,ID1,ID3,IL24,ITGB8,JAG1,JAM2,KCNJ2,KCNMA1,KCTD10,LIF,MAML1,MAP2K6,MAP3K3,MET,MMP3,MYOCD,NR2F2,NR4A2,NRAS,PAPPA,PDCD6,PDE2A,PER2,PNPLA6,PRDM1,PTGS2,PTK2,PTPN1,PTX3,RAPGEF1,RASA1,RBPJ,RGCC,RGS…	89
Cardiovascular System Development and Function, Organismal Development	angiogenesis	6.49e-18		0.959	ADAM8,ADAMTS1,ADM2,AKT3,ANGPT1,ANGPTL1,AP3S2,APLN,ARAP3,ARNT,BDKRB2,BDNF,BMP2,CCL11,CD34,COL13A1,CXCL8,CXXC5,ECE1,EDN1,EDNRA,EDNRB,ELN,EMP2,EPHB2,ESM1,F2RL1,FGF1,FGF7,GDNF,GLI3,H2AFX,HEG1,HGF,HMOX1,ID1,ID3,IL24,ITGB8,JAG1,JAM2,KCNJ2,KCNMA1,KCTD10,LIF,MAML1,MAP2K6,MAP3K3,MET,MMP3,MYOCD,NR2F2,NR4A2,PAPPA,PDCD6,PDE2A,PNPLA6,PRDM1,PTGS2,PTK2,PTPN1,PTX3,RAPGEF1,RASA1,RBPJ,RGCC,RGS4,RHOJ,RSPO3,SEMA3A,S…	81
Cardiovascular System Development and Function, Organismal Development	vasculogenesis	1.62e-17		1.152	ADAMTS1,ANGPT1,ANGPTL1,AP3S2,APLN,ARNT,BDKRB2,BDNF,BMP2,CCL11,CD34,COL13A1,CXCL8,CXXC5,ECE1,EDN1,EDNRA,EDNRB,ELN,EPHB2,F2RL1,FGF1,GDNF,GLI3,H2AFX,HEG1,HGF,HMOX1,ID1,ID3,IL24,ITGB8,JAG1,JAM2,KCNJ2,KCNMA1,LIF,MAML1,MAP2K6,MAP3K3,MET,MMP3,MYOCD,NR2F2,NR4A2,PAPPA,PDCD6,PDE2A,PNPLA6,PRDM1,PTGS2,PTK2,PTPN1,PTX3,RASA1,RBPJ,RGCC,RGS4,RHOJ,SEMA3A,SEMA3C,SEMA5A,SMAD3,SOCS3,SOX17,SPRY4,TEAD2,TNFSF15,TUBA4A,…	71
Cardiovascular System Development and Function, Cellular Movement	migration of endothelial cells	1.95e-10		0.232	ACKR3,ADAMTS1,ANGPT1,ANGPTL1,ARNT,BDNF,BMP2,CXCL8,CXXC5,DLC1,EDN1,ELN,F2RL1,FGF1,GIPC1,HGF,ID1,ID3,IL24,MAP2K6,MET,NR4A2,PDCD6,PDE2A,PTGS2,PTK2,PTPN1,RGCC,SEMA3A,SEMA5A,SPRY4,TNFSF15,WNT5A	33
Cardiovascular System Development and Function	morphology of vasculature	4.85e-10			ACKR3,ANGPT1,APLN,ARAP3,ARNT,BDKRB2,BMP2,DLC1,ECE1,EDN1,EDNRA,EDNRB,ELN,F2RL1,FGF1,HGF,HMOX1,ID1,ID3,ITGB8,KCTD10,LIF,MYOCD,NR2F2,PAPPA,PER2,PRDM1,PTK2,RASA1,RBPJ,RGS2,SEMA5A,SMAD9,SOX4,TNFRSF1B	35
Cardiovascular System Development and Function, Cellular Movement	cell movement of endothelial cells	5.69e-10		0.282	ACKR3,ADAMTS1,ANGPT1,ANGPTL1,ARNT,BDNF,BMP2,CCL11,CXCL8,CXXC5,DLC1,EDN1,ELN,F2RL1,FGF1,GIPC1,HGF,ID1,ID3,IL24,MAP2K6,MET,NR4A2,PDCD6,PDE2A,PTGS2,PTK2,PTPN1,RGCC,SEMA3A,SEMA5A,SPRY4,TNFSF15,WNT5A	34
Cardiovascular System Development and Function	morphology of vessel	6.36e-10			ACKR3,ANGPT1,APLN,BDKRB2,BMP2,ECE1,EDN1,EDNRA,EDNRB,ELN,F2RL1,FGF1,HGF,HMOX1,ITGB8,JAG1,KCTD10,LIF,MET,MYOCD,NR2F2,NRAS,PAPPA,PER2,PRDM1,PTK2,RASA1,RBPJ,SEMA5A,SMAD9,SOX4,TNFRSF1B	32
Cardiovascular System Development and Function	morphology of cardiovascular system	2e-09			ABCC9,ACKR3,AKT3,ANGPT1,APLN,ARNT,BDKRB2,BIRC3,BMP2,CCND3,CPT1A,DVL3,ECE1,EDN1,EDNRA,EDNRB,ELN,F2RL1,FGF1,GDNF,HEG1,HGF,HMOX1,HTT,IL11,IL33,ITGB8,JAG1,KCTD10,LIF,MAML1,MAP2K4,MAP2K6,MAPK3,MARCKSL1,MYOCD,NR2F2,NRAS,NT5E,PAPPA,PER2,PRDM1,PTGS2,PTK2,RASA1,RBPJ,RGS2,RGS4,RSPO3,SEMA3A,SEMA5A,SGTA,SLC6A6,SMAD3,SMAD9,SOX4,SPEG,TNFRSF1B	58
Cardiovascular System Development and Function, Cellular Development, Cellular Function and Maintenance, Cellular Growth and Proliferation, Organismal Development, Tissue Development	endothelial cell development	5.37e-09		0.397	ADAMTS1,ANGPT1,ANGPTL1,BDNF,BMP2,CCL11,CD34,CXCL8,EDN1,EDNRB,F2RL1,FGF1,HEG1,HGF,HMOX1,ID1,KCNJ2,MAP2K6,MET,NR2F2,NR4A2,PDCD6,PDE2A,PTGS2,PTK2,PTPN1,RGCC,SEMA3A,SEMA5A,SPRY4,TNFSF15,WNT5A	32
Cardiovascular System Development and Function, Tissue Morphology	morphology of blood vessel	5.57e-09			ACKR3,ANGPT1,APLN,BDKRB2,BMP2,ECE1,EDN1,EDNRA,EDNRB,ELN,F2RL1,FGF1,HGF,HMOX1,ITGB8,KCTD10,LIF,MYOCD,NR2F2,PAPPA,PER2,PRDM1,PTK2,RASA1,RBPJ,SEMA5A,SMAD9,SOX4,TNFRSF1B	29
Cardiovascular System Development and Function, Cellular Development, Cellular Function and Maintenance, Cellular Growth and Proliferation, Organismal Development, Tissue Development	proliferation of endothelial cells	6.25e-09		-0.228	ADAMTS1,ANGPT1,ANGPTL1,BDNF,BMP2,CCL11,CD34,CXCL8,EDN1,EDNRB,F2RL1,FGF1,HGF,HMOX1,ID1,KCNJ2,NR2F2,NR4A2,PDCD6,PDE2A,PTGS2,PTK2,PTPN1,RGCC,SEMA3A,SEMA5A,SPRY4,TNFSF15,WNT5A	29
Cardiovascular Disease, Cardiovascular System Development and Function, Organismal Injury and Abnormalities	abnormal morphology of vasculature	8.37e-09			ACKR3,ARAP3,ARNT,BDKRB2,BMP2,DLC1,ECE1,EDN1,EDNRA,EDNRB,ELN,HGF,HMOX1,ID1,ID3,ITGB8,KCTD10,LIF,MYOCD,NR2F2,PER2,PRDM1,PTK2,RASA1,RBPJ,RGS2,SEMA5A,SMAD9,SOX4,TNFRSF1B	30
Cardiovascular System Development and Function, Embryonic Development, Organ Development, Organismal Development, Tissue Development	cardiogenesis	9.55e-09		-1.215	ACKR3,ANGPT1,AP3S2,BDNF,BICC1,BMP2,CCND3,DLC1,DVL3,ECE1,EDN1,EDNRA,FGF1,GLI3,HEG1,HMOX1,ID1,ID3,JAG1,KCNJ8,KCTD10,LIF,MAML1,MAP2K6,MARCKSL1,MYOCD,NR2F2,PDE2A,PRDM1,PTK2,RBPJ,RGS2,RGS4,SEMA3C,SMAD3,SMAD9,SOX17,SOX4,TUBA4A,WDR1,WNT5A	41
Cardiovascular System Development and Function, Organ Morphology, Organismal Development	morphology of heart	1.65e-08			ABCC9,ACKR3,AKT3,ANGPT1,APLN,BIRC3,CCND3,CPT1A,DVL3,ECE1,EDN1,EDNRA,ELN,F2RL1,HEG1,HGF,HMOX1,HTT,IL11,IL33,ITGB8,JAG1,KCTD10,LIF,MAML1,MAP2K4,MAP2K6,MAPK3,MARCKSL1,MYOCD,NR2F2,NRAS,NT5E,PTGS2,PTK2,RASA1,RBPJ,RGS2,RGS4,RSPO3,SEMA3A,SGTA,SLC6A6,SMAD3,SOX4,SPEG	46
Cardiovascular System Development and Function, Cellular Movement	migration of vascular endothelial cells	1.22e-07		0.572	ACKR3,ADAMTS1,ANGPT1,BDNF,CXXC5,DLC1,EDN1,F2RL1,HGF,ID1,ID3,IL24,MET,NR4A2,PDE2A,PTGS2,PTPN1,SPRY4,TNFSF15	19
Cardiovascular System Development and Function, Cellular Movement	movement of vascular endothelial cells	1.52e-07		0.926	ACKR3,ADAMTS1,ANGPT1,BDNF,CXCL8,CXXC5,DLC1,EDN1,F2RL1,HGF,ID1,ID3,IL24,MET,NR4A2,PDE2A,PTGS2,PTPN1,SPRY4,TNFSF15	20
Cardiovascular System Development and Function, Tissue Morphology	morphology of artery	1.68e-07			ANGPT1,BDKRB2,BMP2,ECE1,EDN1,EDNRA,EDNRB,ELN,FGF1,HGF,HMOX1,KCTD10,MYOCD,PRDM1,PTK2,RASA1,RBPJ,SOX4	18
Cardiovascular Disease, Cardiovascular System Development and Function, Organismal Injury and Abnormalities, Tissue Morphology	abnormal morphology of blood vessel	3.12e-07			ACKR3,BDKRB2,BMP2,ECE1,EDN1,EDNRA,EDNRB,ELN,HMOX1,ITGB8,KCTD10,LIF,MYOCD,NR2F2,PER2,PRDM1,PTK2,RASA1,RBPJ,SEMA5A,SMAD9,SOX4,TNFRSF1B	23
Cardiovascular System Development and Function, Hematological System Development and Function	blood pressure	2.44e-06		-1.193	ABCC9,ADM2,AGTRAP,APLN,BDKRB2,BDNF,CD34,ECE1,EDN1,EDNRA,EDNRB,ELN,F2RL1,GDNF,GPER1,HMOX1,IL11,KCNMA1,MAML1,NPR3,PTGS2,PTPN1,RGS2,TNFRSF1B	24
Cardiovascular System Development and Function	morphogenesis of cardiovascular system	2.49e-06			ANGPT1,BMP2,CXCL8,DLC1,DVL3,EDN1,HEG1,HGF,ID1,MAML1,MAP2K6,MET,NR2F2,PRDM1,PTK2,RASA1,RBPJ,SMAD3,SOX17,SOX4,WNT5A	21
Cardiovascular Disease, Cardiovascular System Development and Function, Organismal Injury and Abnormalities, Tissue Morphology	abnormal morphology of artery	2.72e-06			BDKRB2,BMP2,ECE1,EDN1,EDNRA,EDNRB,ELN,HMOX1,KCTD10,MYOCD,PRDM1,PTK2,RASA1,RBPJ,SOX4	15
Cardiovascular Disease, Cardiovascular System Development and Function, Organ Morphology, Organismal Development, Organismal Injury and Abnormalities	enlargement of heart	3.45e-06			ABCC9,ANGPT1,APLN,CPT1A,ECE1,EDN1,EDNRA,ELN,F2RL1,HGF,HMOX1,IL11,IL33,LIF,MAP2K4,MAP2K6,MAPK3,MYOCD,NT5E,PTGS2,PTK2,RGS2,RGS4,SEMA3A,SMAD3,SPEG	26
Cardiovascular System Development and Function, Hematological System Development and Function	mean arterial pressure	5.42e-06		-1.002	ADM2,APLN,BDKRB2,BDNF,EDN1,EDNRA,EDNRB,ELN,GDNF,GPER1,PTPN1	11
Cardiovascular System Development and Function, Cellular Development, Cellular Growth and Proliferation, Organ Development, Skeletal and Muscular System Development and Function, Tissue Development	proliferation of vascular smooth muscle cells	6.81e-06		-0.131	AGTRAP,BMP2,CXCL8,EDN1,GPER1,HGF,HMOX1,ID3,PAPPA,PTPN1,SMAD3,SOCS3,TNFRSF10B,TNFRSF1B,TRIB1	15
Cardiovascular Disease, Cardiovascular System Development and Function, Organismal Injury and Abnormalities, Tissue Morphology	lack of right subclavian artery	9.16e-06			ECE1,EDN1,EDNRA	3
Cardiovascular Disease, Cardiovascular System Development and Function	abnormal morphology of cardiovascular system	1.07e-05			ACKR3,ARNT,BDKRB2,BIRC3,BMP2,CCND3,DVL3,ECE1,EDN1,EDNRA,EDNRB,ELN,GDNF,HEG1,HMOX1,ITGB8,JAG1,KCTD10,LIF,MAML1,MYOCD,NR2F2,NRAS,PER2,PRDM1,PTK2,RASA1,RBPJ,RSPO3,SEMA3A,SEMA5A,SLC6A6,SMAD9,SOX4,TNFRSF1B	35
Cardiovascular Disease, Cardiovascular System Development and Function, Organ Morphology, Organismal Development, Organismal Injury and Abnormalities	hypertrophy of heart	2.72e-05			ANGPT1,APLN,CPT1A,ECE1,EDN1,EDNRA,ELN,F2RL1,HGF,HMOX1,IL11,IL33,LIF,MAP2K4,MAP2K6,MAPK3,MYOCD,NT5E,PTGS2,PTK2,RGS2,RGS4,SEMA3A,SMAD3	24
Cardiovascular System Development and Function, Cellular Development, Cellular Function and Maintenance, Cellular Growth and Proliferation, Embryonic Development, Hematological System Development and Function, Lymphoid Tissue Structure and Development, Organ Development, Organismal Development, Tissue Development	proliferation of lymphatic endothelial cells	6.11e-05		1.406	CXCL8,EDN1,EDNRB,FGF1,HGF	5
Cardiovascular System Development and Function, Tissue Morphology	contraction of blood vessel	7.96e-05		-0.402	EDN1,EDNRB,FGF1,HMOX1,MAML1,RGS2	6
Cardiovascular System Development and Function, Organismal Development	formation of blood vessel	0.000104		1.414	ADAMTS1,ANGPT1,AP3S2,CCL11,COL13A1,FGF1,HGF,JAG1,NR4A2,PDE2A,PRDM1,PTK2,TUBA4A,WLS	14
Cardiovascular System Development and Function, Cellular Development, Tissue Development	differentiation of endothelial cells	0.000104		-0.218	ANGPT1,EDN1,ID1,IL24,JAG1,KDM6B,LIF,PTGS2,SOX17	9
Cardiovascular Disease, Cardiovascular System Development and Function, Organismal Injury and Abnormalities, Tissue Morphology	abnormal morphology of dorsal aorta	0.000114			EDNRA,KCTD10,MYOCD,PRDM1,PTK2,RASA1,RBPJ	7
Cardiovascular System Development and Function, Organismal Development, Tissue Morphology	vasodilation of mesenteric artery	0.000117		-0.152	ABCC9,GPER1,PTPN1,RGS2	4
Cardiovascular System Development and Function, Cellular Development, Cellular Growth and Proliferation, Connective Tissue Development and Function, Digestive System Development and Function, Hepatic System Development and Function, Organ Development, Organismal Development, Tissue Development	proliferation of hepatic stellate cells	0.000129		0.469	EDN1,EDNRA,EDNRB,F2RL1,HGF,PTGS2,SMAD3	7
Cardiovascular System Development and Function, Cell-To-Cell Signaling and Interaction	activation of endothelial cells	0.00013		0.728	ANGPT1,EDN1,F2RL1,HGF,ID1,ID3,IL11,IL33	8
Cardiovascular Disease, Cardiovascular System Development and Function, Cell Morphology, Organ Morphology, Organismal Development, Organismal Injury and Abnormalities, Skeletal and Muscular Disorders, Skeletal and Muscular System Development and Function, Tissue Morphology	hypertrophy of cardiac muscle	0.000143			ECE1,EDN1,EDNRA,HGF,IL11,IL33,LIF,MAP2K4,MAP2K6,MYOCD,PTK2,RGS2,RGS4	13
Cardiovascular System Development and Function, Cellular Development, Skeletal and Muscular System Development and Function, Tissue Development	differentiation of cardiomyocytes	0.000143		0.9	APLN,BMP2,CENPF,ID3,KDM6B,LIF,MAP2K4,MYOCD	8
Cardiovascular Disease, Cardiovascular System Development and Function, Organismal Injury and Abnormalities, Tissue Morphology	abnormal morphology of subclavian artery	0.000162			ECE1,EDN1,EDNRA,ELN	4
Cardiovascular System Development and Function, Cell Morphology, Embryonic Development, Organ Development, Organ Morphology, Organismal Development, Skeletal and Muscular System Development and Function, Tissue Development, Tissue Morphology	size of ventricular myocytes	0.000162			EDN1,MAP2K6,MARCKSL1,RGS2	4
